# Supplementary material for: Strategies for mitigating adverse events related to selective RET inhibitors in patients with RET-altered cancers
Source: PubMed Central journal article supplement (PMC10772460; doi:10.1016/j.xcrm.2023.101332), 2023-12-19
Supplement: mmc1.pdf [file mmc1.pdf]

**Cell Reports Medicine, Volume 4**

**Supplemental information**

**Strategies for mitigating adverse events**

**related to selective RET inhibitors**

**in patients with RET-altered cancers**

**Mirella Nardo, Mohamed A. Gouda, Blessie E. Nelson, Carmelia M.N. Barreto, J. Hoyt Slade, Anna Poullard, Mark Zafereo, Mimi I. Hu, Maria E. Cabanillas, and Vivek Subbiah**

## SUPPLEMENT

**Supplementary Table 1.** ORR among the different RET inhibitors

| Reference                                                       | Phase | RET inhibitor | Disease                                      | Response rate for RET alterations (%)                            |
|-----------------------------------------------------------------|-------|---------------|----------------------------------------------|------------------------------------------------------------------|
| Schlumberger et al., 2017 <sup>1</sup>                          | III   | cabozantinib  | RET-mutant MTC                               | 28 (34% if RET M918T mutation)                                   |
| Drilon et al., 2016 <sup>2</sup>                                | II    | cabozantinib  | RET-fusion NSCLC                             | 28                                                               |
| Wells et al., 2012 <sup>3</sup>                                 | III   | vandetanib    | RET-mutant MTC*                              | 30.9-51.8                                                        |
| Wirth et al., 2020/2022 <sup>4</sup>                            | I/II  | selpercatinib | RET-mutant MTC**                             | 73 (69% if previous non-selective RET inhibitor)                 |
| Drilon et al., 2020/2022 <sup>5</sup>                           | I/II  | selpercatinib | RET-fusion NSCLC                             | 85 (64% if previous platinum treatment)                          |
| Subbiah et al., 2022 <sup>6</sup><br><br>(LIBRETTO-001)         | I/II  | selpercatinib | RET-fusion pan-tumor (except MTC and NSCLC)  | 43.9                                                             |
| Subbiah et al., 2021 <sup>7</sup><br>(cohort from ARROW trial)  | I/II  | pralsetinib   | RET-mutant MTC or RET-fusion thyroid cancer  | 71 (89% if RET-fusion thyroid cancer; 60% of ORR in second line) |
| Griensinger et al., 2022 <sup>8</sup> (cohort from ARROW trial) | I/II  | pralsetinib   | RET-fusion NSCLC                             | 72                                                               |
| Subbiah et al., 2022 <sup>9</sup><br>(ARROW trial)              | I/II  | pralsetinib   | RET-altered pan-tumor (except MTC and NSCLC) | 57                                                               |

\*Patients with MEN2A (type 2A multiple endocrine neoplasia), MEN2B (type 2B multiple endocrine neoplasia), or FMTC (familial medullary thyroid cancer) and a germline RET mutation were eligible.

\*\*Mutations non-specified in the inclusion criteria

**Supplementary Table 2.** Selpercatinib suggested dose modification

| <b>Dose reduction</b> | <b>Less than 50 Kg</b>   | <b>≥ 50 Kg</b>            |
|-----------------------|--------------------------|---------------------------|
| First                 | 80 mg orally twice daily | 120 mg orally twice daily |
| Second                | 40 mg orally twice daily | 80 mg orally twice daily  |
| Third                 | 40 mg orally once daily  | 40 mg orally twice daily  |

**Supplementary Table 3.** Pralsetinib suggested dose modification

| <b>Dose reduction</b> | <b>All patients</b>      |
|-----------------------|--------------------------|
| First                 | 300 mg orally once daily |
| Second                | 200 mg orally once daily |
| Third                 | 100 mg orally once daily |

**Supplementary Table 4:** Selpercatinib Dose Modifications when Combined with Moderate and Strong CYP3A Inhibitors

| <b>Current Selpercatinib Dosage</b> | <b>Recommended Selpercatinib Dosage</b> |                               |
|-------------------------------------|-----------------------------------------|-------------------------------|
|                                     | <b>Moderate CYP3A Inhibitor</b>         | <b>Strong CYP3A Inhibitor</b> |
| 120 mg orally twice daily           | 80 mg orally twice daily                | 40 mg orally twice daily      |
| 160 mg orally twice daily           | 120 mg orally twice daily               | 80 mg orally twice daily      |

**Supplementary Table 5:** Pralsetinib Dose Modifications when Combined with P-gp and Strong CYP3A Inhibitors

| <b>Current Pralsetinib Dosage</b> | <b>Recommended Pralsetinib Dosage</b> |
|-----------------------------------|---------------------------------------|
| 400 mg orally once daily          | 200 mg orally once daily              |
| 300 mg orally once daily          | 200 mg orally once daily              |
| 200 mg orally once daily          | 100 mg orally once daily              |

## REFERENCES

1. Schlumberger, M., Elisei, R., Muller, S., Schoffski, P., Brose, M., Shah, M., Licitra, L., Krajewska, J., Kreissl, M.C., Niederle, B., et al. (2017). Overall survival analysis of EXAM, a phase III trial of cabozantinib in patients with radiographically progressive medullary thyroid carcinoma. *Ann Oncol* 28, 2813-2819. 10.1093/annonc/mdx479.
2. Drilon, A., Rekhman, N., Arcila, M., Wang, L., Ni, A., Albano, M., Van Voorthuysen, M., Somwar, R., Smith, R.S., Montecalvo, J., et al. (2016). Cabozantinib in patients with advanced RET-rearranged non-small-cell lung cancer: an open-label, single-centre, phase 2, single-arm trial. *Lancet Oncol* 17, 1653-1660. 10.1016/S1470-2045(16)30562-9.
3. Wells, S.A., Jr., Robinson, B.G., Gagel, R.F., Dralle, H., Fagin, J.A., Santoro, M., Baudin, E., Elisei, R., Jarzab, B., Vasselli, J.R., et al. (2012). Vandetanib in patients with locally advanced or metastatic medullary thyroid cancer: a randomized, double-blind phase III trial. *J Clin Oncol* 30, 134-141. 10.1200/JCO.2011.35.5040.
4. Wirth, L.J., Brose, M.S., Elisei, R., Capdevila, J., Hoff, A.O., Hu, M.I., Tahara, M., Robinson, B., Gao, M., Xia, M., et al. (2022). LIBRETTO-531: a phase III study of selpercatinib in multikinase inhibitor-naïve RET-mutant medullary thyroid cancer. *Future Oncol*. 10.2217/fon-2022-0657.
5. Drilon, A., Subbiah, V., Gautschi, O., Tomasini, P., de Braud, F., Solomon, B.J., Shao-Weng Tan, D., Alonso, G., Wolf, J., Park, K., et al. (2022). Selpercatinib in Patients With RET Fusion-Positive Non-Small-Cell Lung Cancer: Updated Safety and Efficacy From the Registrational LIBRETTO-001 Phase I/II Trial. *J Clin Oncol*, JCO2200393. 10.1200/JCO.22.00393.
6. Subbiah, V., Wolf, P.J., Konda, B., Kang, H., Spira, A., Weiss, J., Takeda, M., Ohe, Y., Khan, S., Ohashi, K., et al. (2022). Tumour-agnostic efficacy and safety of selpercatinib in patients with RET fusion-positive solid tumours other than lung or thyroid tumours (LIBRETTO-001): a phase 1/2, open-label, basket trial. *Lancet Oncol*. 10.1016/s1470-2045(22)00541-1.
7. Subbiah, V., Hu, M.I., Wirth, L.J., Schuler, M., Mansfield, A.S., Curigliano, G., Brose, M.S., Zhu, V.W., Leboulleux, S., Bowles, D.W., et al. (2021). Pralsetinib for patients with advanced or metastatic RET-altered thyroid cancer (ARROW): a multi-cohort, open-label, registrational, phase 1/2 study. *Lancet Diabetes Endocrinol* 9, 491-501. 10.1016/S2213-8587(21)00120-0.
8. Griesinger, F., Curigliano, G., Thomas, M., Subbiah, V., Baik, C.S., Tan, D.S.W., Lee, D.H., Misch, D., Garralda, E., Kim, D.W., et al. (2022). Safety and efficacy of pralsetinib in RET fusion-positive non-small cell lung cancer including as first-line therapy: update from the ARROW trial. *Ann Oncol*. 10.1016/j.annonc.2022.08.002.
9. Subbiah, V., Cassier, P.A., Siena, S., Garralda, E., Paz-Ares, L., Garrido, P., Nadal, E., Vuky, J., Lopes, G., Kalemkerian, G.P., et al. (2022). Pan-cancer efficacy of pralsetinib in patients with RET fusion-positive solid tumors from the phase 1/2 ARROW trial. *Nat Med* 28, 1640-1645. 10.1038/s41591-022-01931-y.
